# Supplementary material for: Expression of Nutritional Traits in Vegetable Cowpea Grown under Various South African Agro-Ecological Conditions
Source: MDPI journal article supplement (doi:10.3390/plants11111422), 2022-05-27
Supplement: s1 [file s1]

## Supplementary tables

**Table S1** Mean performance of cowpea genotypes for protein content (%) across six environments

| Genotype        | Mafikeng 2016 | Potch 2016 | Potch 2017 | RPT 2016 | RPT 2017 | Venda 2016 |
|-----------------|---------------|------------|------------|----------|----------|------------|
| Veg cowpea 1    | 31.23         | 31.34      | 29.94      | 24.57    | 35.21    | 21.24      |
| TVU-14196       | 31.78         | 30.22      | 30.46      | 30.54    | 34.15    | 21.29      |
| Veg cowpea 2    | 32.45         | 34.47      | 34.62      | 27.68    | 35.38    | 22.09      |
| Meter long bean | 29.57         | 27.80      | 29.96      | 28.12    | 29.23    | 23.19      |
| Vigna Onb       | 32.85         | 31.92      | 34.4       | 27.75    | 32.54    | 24.78      |
| Kisumu mix      | 35.22         | 34.42      | 35.6       | 30.04    | 33.33    | 22.66      |
| M217            | 34.10         | 28.96      | 32.38      | 23.8     | 30.72    | 22.12      |
| Ukaluleni       | 31.06         | 31.78      | 31.60      | 28.64    | 27.52    | 22.87      |
| VCDC            | 34.12         | 30.58      | 33.50      | 25.69    | 36.04    | 22.70      |
| 5431            | 30.65         | 29.48      | 29.81      | 28.85    | 27.96    | 25.54      |
| Chappy          | 31.70         | 30.56      | 32.67      | 30.06    | 30.21    | 21.27      |
| Mamlaka         | 34.66         | 35.38      | 34.56      | 29.57    | 31.85    | 21.29      |
| IT96D-602       | 31.29         | 29.3       | 30.29      | 25.95    | 30.79    | 23.97      |
| 98K-5301        | 33.35         | 30.81      | 30.38      | 26.95    | 33.44    | 22.36      |
| ITOOK-1060      | 32.78         | 27.09      | 34.83      | 27.22    | 32.04    | 24.38      |
| Grand mean      | 32.45         | 30.94      | 32.33      | 27.70    | 32.03    | 22.78      |
| LSD             | 3.222         | 5.071      | 3.749      | 2.959    | 3.063    | 5.081      |

Potch = Potchefstroom, RPT = Roodeplaat, LSD = Least significant difference, VCDC = Vegetable cowpea dakama cream

**Table S2** Mean performance of cowpea genotypes for Fe (mg.100.g<sup>-1</sup>) concentrations across six environments

| Genotype        | Mafikeng 2016 | Potch 2016 | Potch 2017 | RPT 2016 | RPT 2017 | Venda 2016 |
|-----------------|---------------|------------|------------|----------|----------|------------|
| Veg cowpea 1    | 35.29         | 24.29      | 69.60      | 111.58   | 61.80    | 26.07      |
| TVU-14196       | 45.24         | 20.59      | 64.30      | 66.59    | 67.40    | 27.68      |
| Veg cowpea 2    | 28.87         | 21.89      | 68.00      | 48.87    | 153.30   | 44.68      |
| Meter long bean | 23.50         | 22.62      | 78.80      | 66.97    | 187.90   | 28.48      |
| Vigna Onb       | 25.13         | 16.79      | 76.90      | 39.44    | 109.40   | 30.17      |
| Kisumu mix      | 17.77         | 18.31      | 33.10      | 28.49    | 68.00    | 33.00      |
| M217            | 30.80         | 27.27      | 59.70      | 86.40    | 135.60   | 20.05      |
| Ukaluleni       | 35.78         | 18.98      | 72.20      | 44.04    | 67.00    | 29.06      |
| VCDC            | 25.39         | 19.49      | 71.00      | 165.56   | 90.40    | 42.41      |
| 5431            | 25.52         | 23.79      | 129.40     | 111.35   | 66.20    | 23.73      |
| Chappy          | 27.36         | 25.33      | 94.40      | 41.65    | 101.10   | 37.71      |
| Mamlaka         | 35.47         | 17.17      | 58.20      | 46.60    | 62.40    | 27.21      |
| IT96D-602       | 25.68         | 20.23      | 41.40      | 101.19   | 70.10    | 20.05      |
| 98K-5301        | 33.52         | 17.62      | 72.80      | 56.33    | 75.70    | 22.95      |
| ITOOK-1060      | 41.61         | 18.64      | 62.00      | 41.43    | 60.4     | 29.88      |
| Grand mean      | 30.46         | 20.87      | 70.10      | 70.43    | 91.80    | 29.54      |
| LSD             | 3.725         | 3.993      | 38.85      | 7.333    | 76.87    | 21.878     |

Potch = Potchefstroom, RPT = Roodeplaat, LSD = Least significant difference, VCDC = Vegetable cowpea dakama cream

**Table S3** Mean performance of cowpea genotypes for Zn (mg.100.g<sup>-1</sup>) concentrations across six environments

| Genotype        | Mafikeng 2016 | Potch 2016 | Potch 2017 | RPT 2016 | RPT 2017 | Venda 2016 |
|-----------------|---------------|------------|------------|----------|----------|------------|
| Veg cowpea 1    | 5.30          | 3.07       | 2.723      | 3.04     | 6.17     | 4.01       |
| TVU-14196       | 5.94          | 3.03       | 3.749      | 3.52     | 5.53     | 4.55       |
| Veg cowpea 2    | 5.98          | 2.70       | 3.583      | 3.44     | 6.48     | 3.93       |
| Meter long bean | 7.00          | 2.86       | 3.846      | 3.97     | 6.54     | 3.97       |
| Vigna Onb       | 6.14          | 2.53       | 3.462      | 3.01     | 6.19     | 3.88       |
| Kisumu mix      | 5.01          | 2.85       | 3.734      | 3.45     | 5.83     | 3.96       |
| M217            | 5.08          | 3.43       | 3.018      | 3.43     | 4.68     | 4.34       |
| Ukaluleni       | 5.03          | 2.48       | 3.087      | 4.08     | 6.36     | 3.38       |
| VCDC            | 6.40          | 3.33       | 3.566      | 3.75     | 6.39     | 3.86       |
| 5431            | 5.12          | 2.90       | 2.963      | 3.87     | 7.34     | 3.62       |
| Chappy          | 5.13          | 2.13       | 3.697      | 4.13     | 5.61     | 4.17       |
| Mamlaka         | 5.73          | 2.69       | 3.315      | 3.75     | 6.35     | 3.5        |
| IT96D-602       | 5.51          | 2.82       | 3.436      | 3.29     | 5.96     | 4.46       |
| 98K-5301        | 5.57          | 3.57       | 3.014      | 3.27     | 6.01     | 3.68       |
| ITOOK-1060      | 5.45          | 2.92       | 3.871      | 4.08     | 6.36     | 3.69       |
| Grand mean      | 5.63          | 2.89       | 3.404      | 3.61     | 6.12     | 3.93       |
| LSD             | 1.099         | 0.752      | 0.8653     | 0.634    | 1.481    | 0.76       |

Potch = Potchefstroom, RPT = Roodeplaat, LSD = Least significant difference, VCDC = Vegetable cowpea dakama cream

**Table S4** Mean performance of cowpea genotypes for Mn (mg.100.g<sup>-1</sup>) concentrations across six environments

| Genotype        | Mafikeng 2016 | Potch 2016 | Potch 2017 | RPT 2016 | RPT 2017 | Venda 2016 |
|-----------------|---------------|------------|------------|----------|----------|------------|
| Veg cowpea 1    | 17.73         | 24.00      | 11.69      | 22.66    | 11.54    | 23.11      |
| TVU-14196       | 23.10         | 19.48      | 12.45      | 19.41    | 12.13    | 21.51      |
| Veg cowpea 2    | 19.31         | 16.39      | 11.33      | 16.70    | 12.29    | 24.25      |
| Meter long bean | 21.76         | 26.10      | 15.75      | 20.69    | 13.76    | 19.71      |
| Vigna Onb       | 20.18         | 17.38      | 12.23      | 15.87    | 13.00    | 22.39      |
| Kisumu mix      | 16.63         | 12.76      | 8.62       | 15.48    | 11.69    | 21.24      |
| M217            | 22.20         | 20.41      | 12.94      | 18.27    | 11.39    | 19.86      |
| Ukaluleni       | 20.89         | 14.70      | 12.30      | 17.82    | 13.88    | 19.37      |
| VCDC            | 17.36         | 16.90      | 12.16      | 17.09    | 11.20    | 23.33      |
| 5431            | 23.76         | 22.39      | 14.99      | 16.09    | 11.45    | 21.85      |
| Chappy          | 19.12         | 14.99      | 12.95      | 14.54    | 13.31    | 24.45      |
| Mamlaka         | 21.55         | 15.60      | 11.56      | 16.59    | 12.17    | 25.84      |
| IT96D-602       | 21.42         | 18.12      | 10.85      | 14.27    | 11.30    | 14.43      |
| 98K-5301        | 24.25         | 15.74      | 14.98      | 19.21    | 13.13    | 24.90      |
| ITOOK-1060      | 23.13         | 13.89      | 10.77      | 14.26    | 11.63    | 21.00      |
| Grand mean      | 20.83         | 17.92      | 12.37      | 17.26    | 12.26    | 21.82      |
| LSD             | 3.863         | 3.137      | 2.089      | 2.881    | 2.881    | 8.993      |

Potch = Potchefstroom, RPT = Roodeplaat, LSD = Least significant difference, VCDC = Vegetable cowpea dakama cream
